# Supplementary material
Source: PubMed Central journal article supplement (PMC509231)

Height

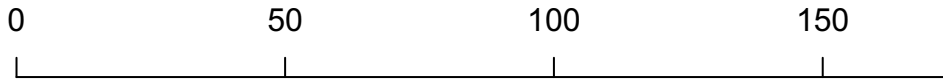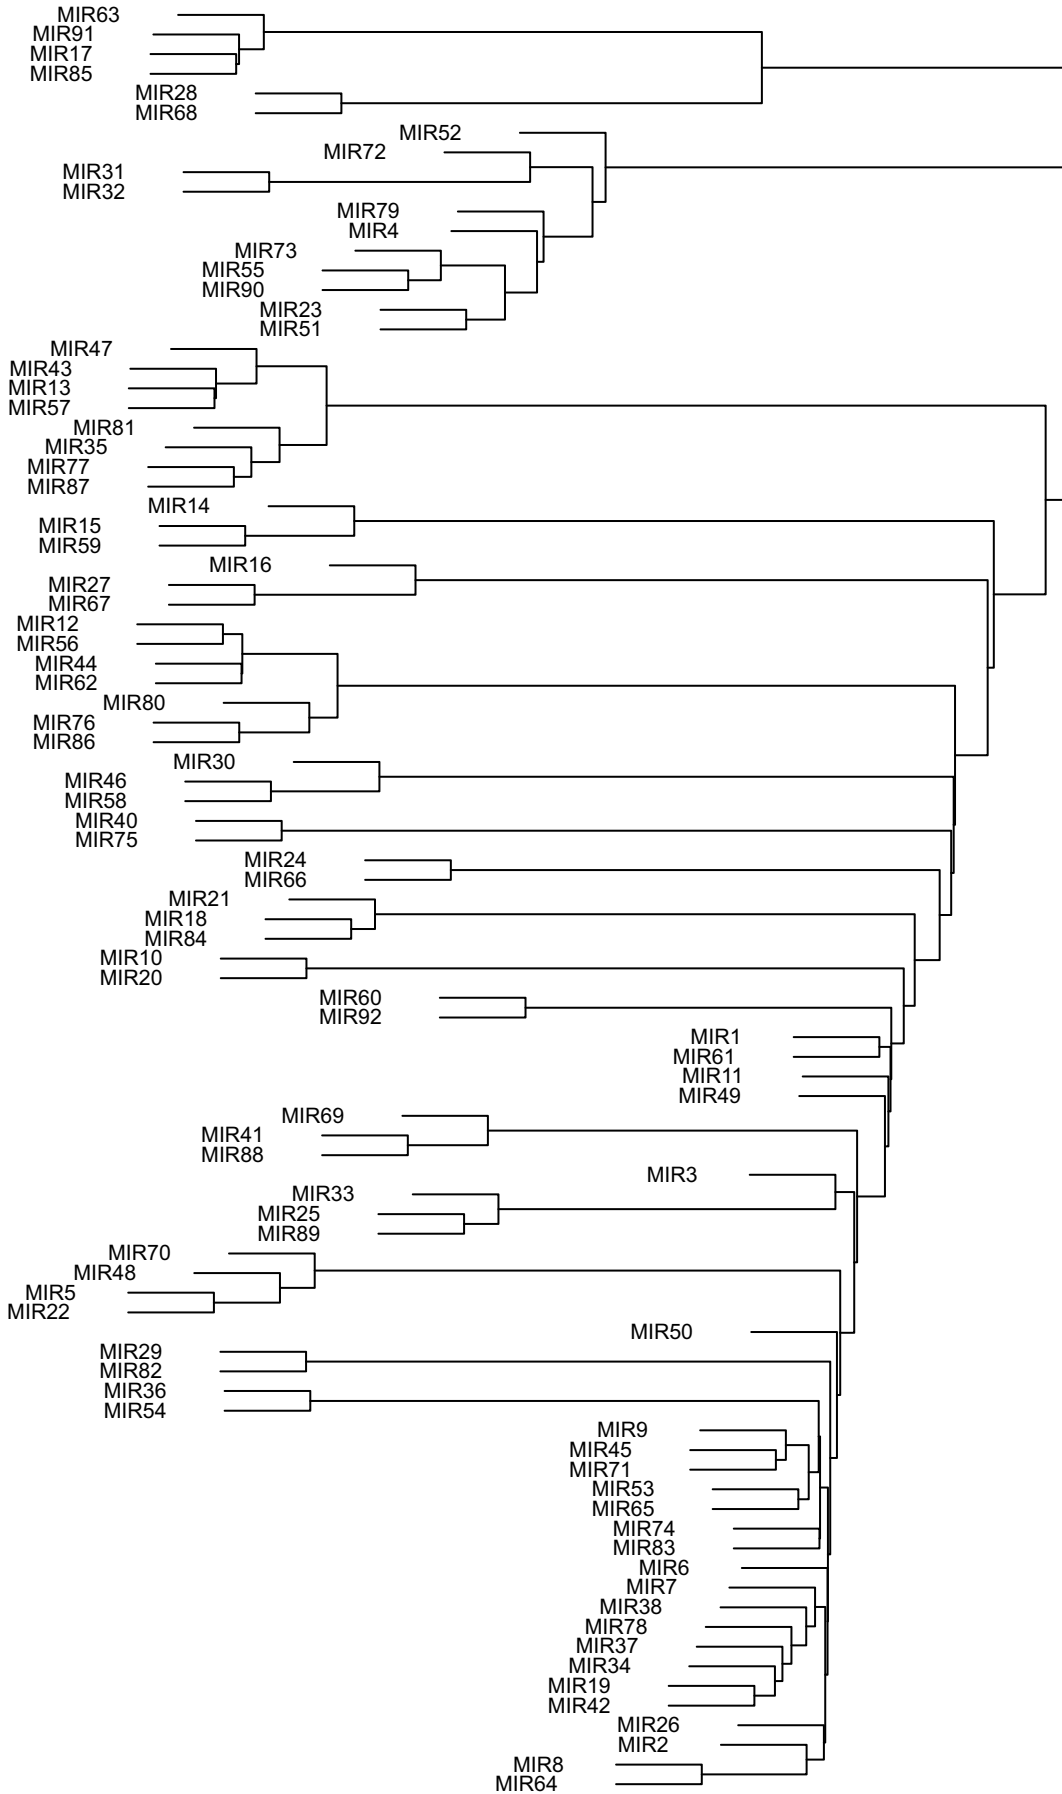

Cluster Dendrogram

Supplement: pnas_101_31_11511__3.pdf [file pnas_101_31_11511__3.pdf]
